# Supplementary material
Source: Frontiers journal article supplement (https://www.frontiersin.org/articles/298326)
Supplement: Image_3.PDF [file Image_3.PDF]

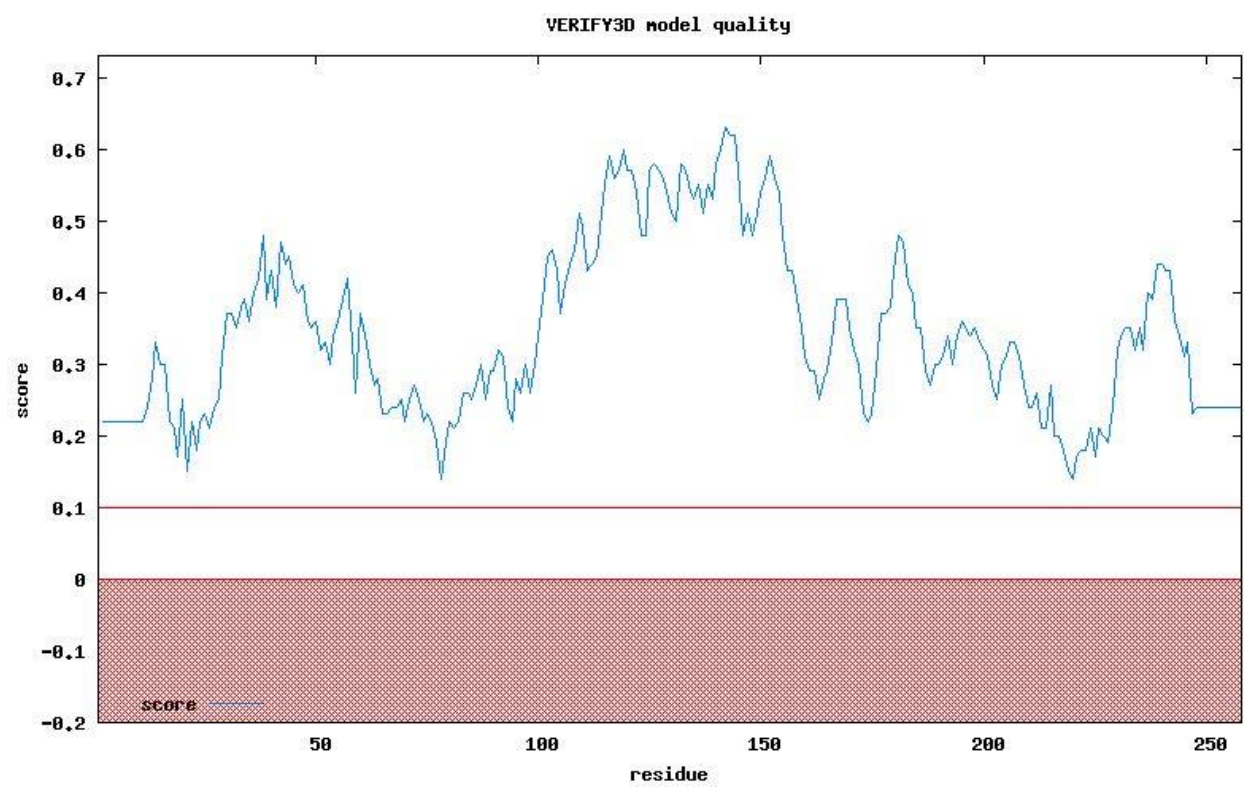

**Supplementary figure, S3:** VERIFY3D Model quality assessment for predicted model.
