# Supplementary material
Source: Frontiers journal article supplement (https://www.frontiersin.org/articles/298326)
Supplement: Table_1.PDF [file Table_1.PDF]

**Supplementary Table, S1: Model quality assessment of Ramachandran plot.**

| <b>Ramachandran plot statistics</b>                  | <b>Residues</b> | <b>%</b> |
|------------------------------------------------------|-----------------|----------|
| Residues in the most favored regions [A,B,L]         | 208             | 92.9%    |
| Residues in the additional allowed regions [a,b,l,p] | 15              | 6.7%     |
| Residues in the generously allowed regions [a,b,l,p] | 1               | 0.4%     |
| Residues in the disallowed regions [xx]              | 0               | 0.0%     |
| Number of non-glycine and non-proline residues       | 224             | 100%     |
| Number of end residues (excl. Gly and Pro)           | 2               |          |
| Number of glycine residues                           | 22              |          |
| Number of proline residues                           | 10              |          |
| Total number of residues                             | 258             |          |
